# Supplementary material for: Highly porous boron nitride as a metal-free heterogeneous catalyst for cycloaddition of CO2 to epoxides
Source: Royal Society of Chemistry journal article supplement (doi:10.1039/d4cy01080a), 2024-01-01
Supplement: d4cy01080a1.pdf [file d4cy01080a1.pdf]

Supplementary Material

**Highly Porous Boron Nitride as a Metal-Free Heterogeneous Catalyst for Cycloaddition of  
CO<sub>2</sub> to Epoxides**

Teppei Miyamoto,<sup>a</sup> Atsushi Takagaki,<sup>\*b</sup> Jun Tae Song,<sup>a,c</sup> Motonori Watanabe,<sup>a,c</sup> and Tatsumi  
Ishihara\*<sup>a,c</sup>

<sup>a</sup> *Department of Applied Chemistry, Faculty of Engineering, Kyushu University, 744 Motoooka,  
Nishi-ku, Fukuoka 819-0395, Japan*

<sup>b</sup> *Division of Materials and Chemical Engineering, Faculty of Engineering, Yokohama National  
University, 79-5 Tokiwadai, Hodogaya-ku, Yokohama, Kanagawa 240-8501, Japan.*

<sup>c</sup> *International Institute for Carbon-Neutral Energy Research (WPI-I<sup>2</sup>CNER), Kyushu  
University, 711 Motoooka, Nishi-ku, Fukuoka 819-0395, Japan.*

E-mail: [takagaki-atsushi-gw@ynu.ac.jp](mailto:takagaki-atsushi-gw@ynu.ac.jp), [ishihara@cstf.kyushu-u.ac.jp](mailto:ishihara@cstf.kyushu-u.ac.jp)

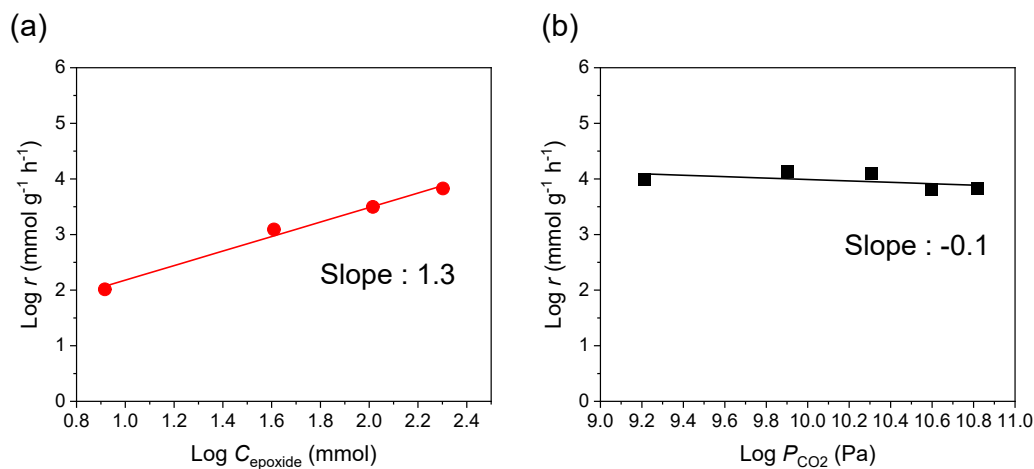

**Figure S1.** Dependence of formation rate of chloroethylene carbonate on (a) concentration of epichlorohydrin and CO<sub>2</sub> pressure. Reaction conditions: (a) epichlorohydrin (2.5-10 mmol), TBAB (39 μmol), CO<sub>2</sub> (0.5 MPa), catalyst (50 mg), toluene (1 mL), 403 K, 1 h. (b) epichlorohydrin (10 mmol), TBAB (39 μmol), CO<sub>2</sub> (0.1-0.5 MPa), catalyst (50 mg), toluene (1 mL), 403 K, 1 h.

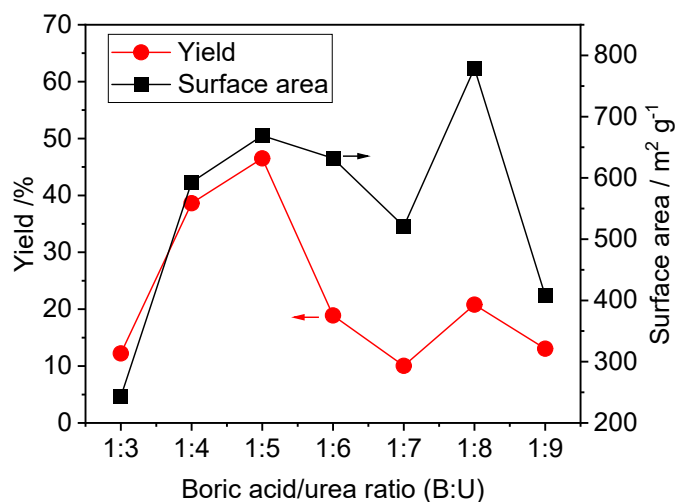

**Figure S2.** Correlation of styrene carbonate yield for cycloaddition of CO<sub>2</sub> to styrene oxide and surface areas of boron nitride synthesized from boric acid and urea at various molar ratios, B: U = 1:y (y = 3~9). Reaction conditions: styrene oxide (20 mmol), TBAB (16 μmol), CO<sub>2</sub> (0.5 MPa), catalyst (100 mg), 403 K, 18 h.

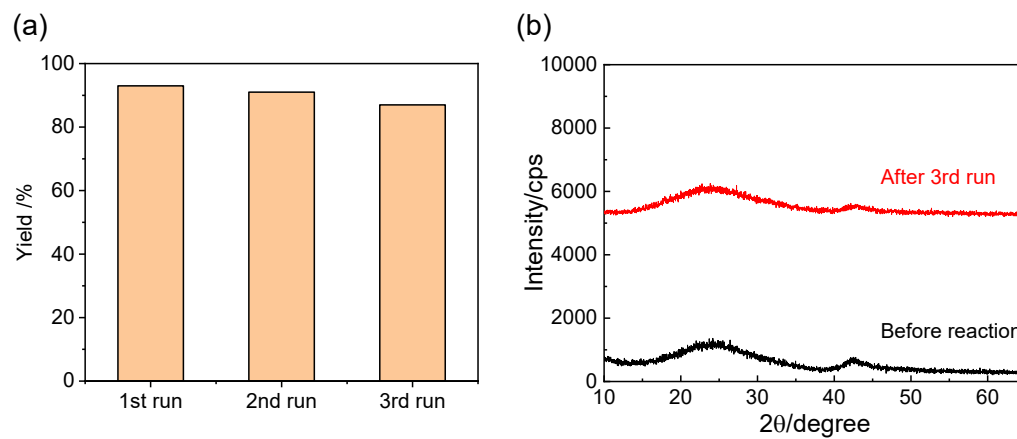

**Figure S3.** Reusability of the boron nitride catalyst (B:M:U = 1:1:5). (a) Product yield (b) XRD patterns before and after reaction. Reaction conditions: epichlorohydrin (10 mmol), TBAB (39  $\mu$ mol), CO<sub>2</sub> (0.5 MPa), catalyst (50 mg), toluene (1 mL), 403 K, 18 h.
